# Supplementary material for: Heterometallic chiral [Mn13Cu8] single-molecule magnets
Source: Royal Society of Chemistry journal article supplement (doi:10.1039/d1dt04291b), 2022-01-01
Supplement: d1dt04291b1.pdf [file d1dt04291b1.pdf]

## Heterometallic Chiral [Mn<sub>13</sub>Cu<sub>8</sub>] Single-Molecule Magnets

Zhiwei Peng,<sup>a</sup> Shu Li,<sup>a</sup> Ao Li,<sup>a</sup> Jiaming Liao,<sup>a</sup> Yiman Wang,<sup>a</sup> Xudong Li,<sup>a</sup> Wei Meng\*<sup>a</sup> and Jian Zhang\*<sup>b</sup>

<sup>a</sup> Hunan Provincial Key Lab of Dark Tea and Jin-Hua, Department of Material & Chemical Engineering, Hunan City University, Yiyang, 413000, P. R. China.

<sup>b</sup> State Key Laboratory of Structural Chemistry, Fujian Institute of Research on the Structure of Matter, Chinese Academy of Sciences, Fuzhou, Fujian 350002, P. R. China.

E-mail: mengw198503@163.com and zhj@fjirsm.ac.cn

## CONTENTS

### Section 1 Experimental Section

**Table S1.** Bond-Valence Sums for the Mn and Cu Atoms of Complexes L-1

**Table S2.** Crystal data and structure refinement for complexes L-1 and D-1

**Table S3.** Selected bond distances (Å) and bond angles (°) in L-1

### Section 2 Supplementary Structural Figures.

**Figure S1.** Schematic view of the coordination modes a, b and c of the tartrate ligands in D-1. (Cu<sup>II</sup> blue, Mn<sup>III</sup> yellow, Mn<sup>II</sup> green, O red, C gray, hydrogen atoms omitted for clarity)

**Figure S2.** Each {Mn<sub>13</sub>Cu<sub>8</sub>} cluster is connected to eight nearest neighbor clusters, creating a 3D network of D-1. The green disordered tetradecahedron represents the {Mn<sub>13</sub>} core. a) the packing arrangement viewed along *a*-axis, b) the packing arrangement viewed along *b*-axis, c) the packing arrangement viewed along *c*-axis. (Cu<sup>II</sup> blue, Mn<sup>III</sup> yellow, Mn<sup>II</sup> green, O red, C gray, hydrogen atoms omitted for clarity)

**Figure S3.** Ball-and-stick representation the 3D supramolecular assembly of D-1 viewed along *a*-axis. (Cu<sup>II</sup> blue, Mn<sup>III</sup> yellow, Mn<sup>II</sup> green, O red, C gray, Na black, K pink, hydrogen atoms omitted for clarity)

**Figure S4.** The {Mn<sub>12</sub>} irregular tetradecahedron with a central Mn<sup>II</sup> in D-1. (Mn<sup>III</sup> yellow, Mn<sup>II</sup> green)

**Figure S5.** Space-filling representation of D-1. (Cu<sup>II</sup> blue, Mn<sup>III</sup> yellow, Mn<sup>II</sup> green, O red, C gray, hydrogen atoms omitted for clarity)

### Section 3 Supplementary Physical Characterization

**Figure S6.** IR spectrum of L-1.

**Figure S7.** IR spectrum of D-1.

**Figure S8.** CD spectra of L-1 and D-1 in a 0.5 M NaOAc/HOAc buffer solution at pH 5.5.

**Figure S9.** CD spectra of L-(+)- and of D-(-)-tartaric acid in water.

**Figure S10.** Variable temperature dc susceptibility data for D-1 in a field of 2000 Oe from 2 – 300 K in log scale.

**Figure S11.** Variable temperature dc susceptibility data for L-1 in a field of 2000 Oe from 2 – 300 K (top). Magnetisation versus field plots at temperatures of 1.8, 2.5, 5.0 and 10 K for L-1 (bottom).

**Figure S12.** Temperature dependent in-phase susceptibility signals D-1 in a 0 Oe dc applied magnetic field, in the temperature range 1.8 – 3.0 K.

**Figure S13.** The temperature-dependence of in phase (top) and out-of-phase (middle) magnetization susceptibility of L-1 at different frequencies by SQUID VSM. The reversed energy barrier fitting plot with  $\ln(\chi''/\chi') = \ln(\omega\tau_0) + U/k_B T$  (bottom). The energy barrier is ca.  $U = 19 (\pm 4)$  K and  $\tau_0 = 2.0 (\pm 0.3) \times 10^{-9}$  s.

**Figure S14.** Frequency dependent in-phase (top) and out-of-phase (bottom) susceptibility signals for L-1 in a 0 Oe dc applied magnetic field, in the temperature range 1.8 – 3.0 K.

**Figure S15.** Frequency dependent in-phase (top) and out-of-phase (bottom) susceptibility signals for D-1 in a 0 Oe dc applied magnetic field, in the temperature range 1.8 – 3.0 K.

**Figure S16.** TGA of L-1.

**Figure S17.** TGA of D-1.

**Figure S18.** Simulated and observed powder X-ray diffraction (PXRD) of L-1.

**Figure S19.** Simulated and observed powder X-ray diffraction (PXRD) of D-1.

**Figure S20.** The EDS characterization for L-1.

**Figure S21.** The EDS characterization for D-1.

## Section 1 Experimental Section

### 1. Materials and Methods:

All of the reagents employed were commercially available and were used without further purification. The infrared (IR) spectra were recorded (400–4000  $\text{cm}^{-1}$  region) on a Nicolet Nexus 670 FTIR spectrometer using KBr pellets. Thermogravimetric analysis (TGA) measurements were carried out using a DSC/TG pan A1203 system in  $\text{N}_2$  flow with a heating rate of 10  $^\circ\text{C min}^{-1}$ . Elemental analyses were performed (C, H, N) by Thermo Scientific FLASH 2000 elemental analyzer; Cu, Mn, K and Na were analyzed on a Varian (720) ICP atomic emission spectrometer. Powder X-ray diffraction (PXRD) patterns were collected at room temperature on a Rigaku D/Max 2500 diffractometer. Variable-temperature direct current (dc) was carried out at Nanjing University using a Quantum Design MPMS-XL-7 SQUID magnetometer equipped with a 7 T magnet and operating in the 1.8–300 K range. Alternating current (ac) magnetic susceptibility data was carried out at Nanjing University using the SQUID PPMS. Dc and ac magnetic measurements were collected by restraining the sample in eicosane in order to prevent torquing due to its magnetic anisotropy.

### 2. Synthesis of L-1 and D-1:

**L-1:** A mixture of  $\text{Cu}(\text{OAc})_2 \cdot \text{H}_2\text{O}$  (199 mg, 1 mmol),  $\text{Mn}(\text{OAc})_2 \cdot 4 \text{H}_2\text{O}$  (245 mg, 1 mmol), and L-(+)-tartaric acid (150 mg, 1 mmol) was dissolved in a sodium acetate/acetic acid buffer solution (pH 5.5, 0.5 M NaOAc/HOAc, 10 mL).  $\text{K}_2\text{CO}_3$  (4 ml, 1 M) and  $\text{HCOONa}$  (1 ml, 1 M) were gradually added while stirring. The mixture was stirred at room temperature for 12 h. Then the resulting black solution was filtered and the filtrate was left undisturbed at ambient temperature. After several days, the black needle crystals were obtained by filtration. The yield is 10% based on copper. Anal. calcd for  $\text{C}_{49.7}\text{H}_{63.5}\text{Cu}_8\text{Mn}_{13}\text{K}_4\text{Na}_6\text{O}_{101.7}$  (L-1): C 15.69, H 1.67, Cu 13.36, Mn 18.77, K 4.11, Na 3.63. Found: C 15.94, H 1.65, Cu 13.26, Mn 18.65, K 4.67, Na 4.42. IR (KBr,  $\text{cm}^{-1}$ ): 3426 s, 1630 s, 1365 s, 1222 w, 1121 m, 1085 m, 1040 m, 953 w, 902 w, 825 m, 744 m, 678 w, 633 w, 574 w, 511 w. D-1 was prepared in a similar fashion to L-1 except that D-(-)-tartaric acid was used instead of L-(+)-tartaric

acid (yield 10 % based on copper). Anal. calcd for  $C_{49.7}H_{69.3}Cu_8Mn_{13}K_4Na_6O_{104.6}$  (D-1): C 15.48, H 1.97, Cu 13.18, Mn 18.52, K 4.05, Na 3.58. Found: C 15.98, H 1.67, Cu 13.23, Mn 18.59, K 4.64, Na 4.50. IR (KBr,  $cm^{-1}$ ): 3431 s, 1637 s, 1366 s, 1220 w, 1126 m, 1084 m, 1042 m, 959 w, 907 w, 823 m, 740 m, 677 w, 635 w, 573 w, 510 w.

### 3. Crystallography:

The crystal data for L-1 was collected at 293 K on a Smart Apex II CCD with graphite-monochromated  $Mo_{K\alpha}$  radiation ( $\lambda = 0.71073 \text{ \AA}$ ). Suitable crystals were affixed to the end of a glass fiber using silicone grease and transferred to the goniostat. The crystal data for D-1 was collected on a Bruker DUO diffractometer using  $Mo K\alpha$  radiation ( $\lambda = 0.71073 \text{ \AA}$ ) and an APEXII CCD area detector. Suitable crystals were attached to glass fibers using silicone grease and transferred to the goniostat where they were cooled to 100 K for data collection. The structures of L-1 were solved by the direct method and refined by the full-matrix least-squares method on  $F^2$  using the *SHELXT 2014/5* and *SHELXL-2018/3* crystallographic software package. The D-1 was solved and refined in *SHELXT 2014/5* and *SHELXL-2018/3*, using full-matrix least-squares refinement. The non-H atoms were refined with anisotropic thermal parameters and all of the H atoms were calculated in idealized positions and refined riding on their parent atoms. Crystallographic data and structural refinements for compounds L-1 and D-1 are summarized in Table S1. More details on the crystallographic studies as well as atomic displacement parameters are given in the CIF files. All carbon-bonded hydrogen atoms were placed in geometrically calculated positions, and hydrogen atoms in water molecules were not assigned or directly included in the molecular formula. In addition, CCDC-1951508 (L-1) and CCDC-1951511 (D-1) contain the supplementary crystallographic data for this paper. These data can be obtained free of charge from the Cambridge Crystallographic Data Centre via [http://www.ccdc.cam.ac.uk/data\\_request/cif](http://www.ccdc.cam.ac.uk/data_request/cif).

**Table S1.** Bond-Valence Sums for the Mn and Cu Atoms of Complexes L-1 <sup>a</sup>

| atom | Mn <sup>II</sup> | Mn <sup>III</sup> | atom | Cu <sup>I</sup> | Cu <sup>II</sup> |
|------|------------------|-------------------|------|-----------------|------------------|
| Mn1  | <u>1.62</u>      | 1.49              | Cu1  | 1.91            | <u>2.12</u>      |
| Mn2  | 3.08             | <u>2.82</u>       | Cu2  | 1.83            | <u>2.04</u>      |
| Mn3  | 3.25             | <u>2.97</u>       | Cu3  | 1.70            | <u>1.89</u>      |
| Mn4  | 3.19             | <u>2.91</u>       | Cu4  | 1.74            | <u>1.93</u>      |
| Mn5  | 3.19             | <u>2.91</u>       | Cu5  | 1.84            | <u>2.05</u>      |
| Mn6  | 3.18             | <u>2.91</u>       | Cu6  | 1.79            | <u>1.99</u>      |
| Mn7  | 3.19             | <u>2.92</u>       | Cu7  | 1.75            | <u>1.96</u>      |
| Mn8  | 3.17             | <u>2.90</u>       | Cu8  | 1.80            | <u>2.00</u>      |
| Mn9  | 3.09             | <u>2.83</u>       |      |                 |                  |
| Mn10 | 3.08             | <u>2.82</u>       |      |                 |                  |
| Mn11 | 3.28             | <u>3.00</u>       |      |                 |                  |
| Mn12 | 3.26             | <u>2.98</u>       |      |                 |                  |
| Mn13 | 3.16             | <u>2.89</u>       |      |                 |                  |

<sup>a</sup>The underlined value is closest to the charge it was calculated. The oxidation state is the nearest whole number to the underlined value.

**Table S2.** Crystal data and structure refinement for complexes L-1 and D-1

| complexes                         | L-1                                           | D-1                                           |
|-----------------------------------|-----------------------------------------------|-----------------------------------------------|
| empirical formula                 | $C_{49.7}H_{63.5}Cu_8Mn_{13}K_4Na_6O_{101.7}$ | $C_{49.7}H_{69.3}Cu_8Mn_{13}K_4Na_6O_{104.6}$ |
| fw                                | 3804.82                                       | 3857.04                                       |
| cryst syst                        | Triclinic                                     | Triclinic                                     |
| space group                       | P1                                            | P1                                            |
| a [Å]                             | 13.0683(7)                                    | 13.0061(5)                                    |
| b [Å]                             | 15.7834(10)                                   | 15.9364(6)                                    |
| c [Å]                             | 16.6333(11)                                   | 16.6526(6)                                    |
| $\alpha$ [deg]                    | 114.266(3)                                    | 114.136(1)                                    |
| $\beta$ [deg]                     | 99.410(3)                                     | 99.411(1)                                     |
| $\gamma$ [deg]                    | 102.907(3)                                    | 102.301(1)                                    |
| V [Å <sup>3</sup> ]               | 2920.1(3)                                     | 2953.44(2)                                    |
| Z                                 | 1                                             | 1                                             |
| Dcalcd [g/cm <sup>-3</sup> ]      | 2.152                                         | 2.155                                         |
| $\mu$ [mm <sup>-1</sup> ]         | 3.065                                         | 3.034                                         |
| F(000)                            | 1853                                          | 1880                                          |
| Flack parameter                   | 0.002(8)                                      | 0.06(2)                                       |
| goodness-of-fit on F <sup>2</sup> | 1.041                                         | 1.033                                         |
| R indices (all data)              | $R_1 = 0.0619$<br>$wR_2 = 0.1688(20346)$      | $R_1 = 0.0491$<br>$wR_2 = 0.1412(14780)$      |
| CCDC                              | 1951508                                       | 2104879                                       |

## Section 2: Supplementary Structural Figures

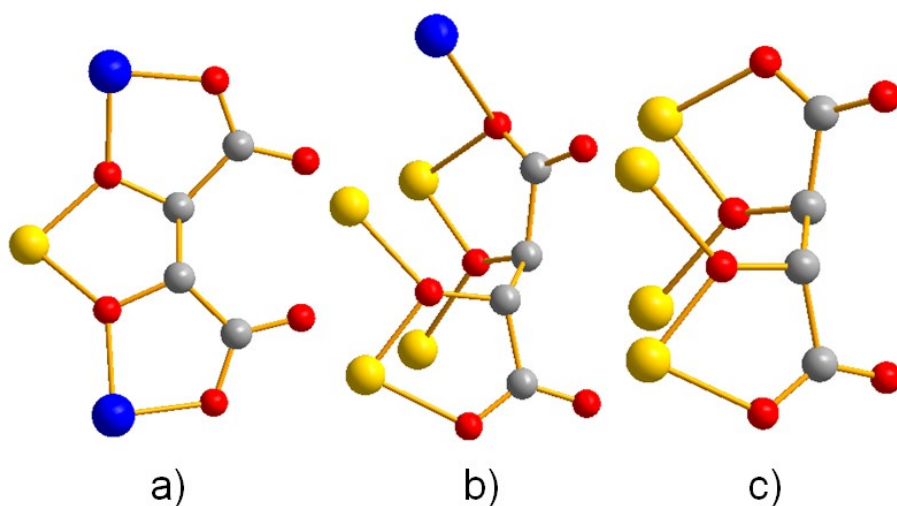

**Figure S1.** Schematic view of the coordination modes a, b and c of the tartrate ligands in D-1. (Cu<sup>II</sup> blue, Mn<sup>III</sup> yellow, Mn<sup>II</sup> green, O red, C gray, hydrogen atoms omitted for clarity)

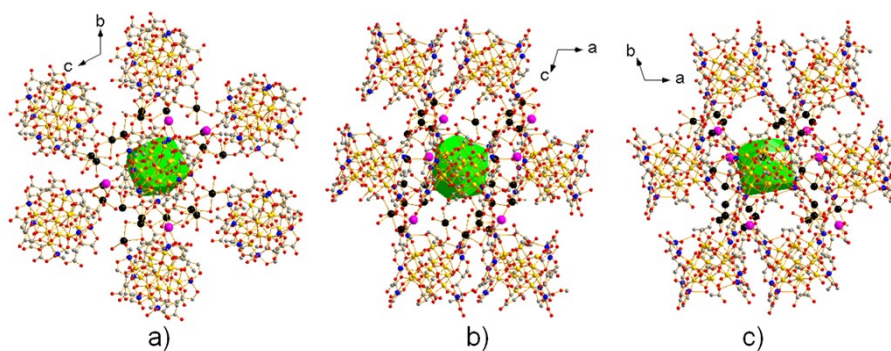

**Figure S2.** Each {Mn<sub>13</sub>Cu<sub>8</sub>} cluster is connected to eight nearest neighbor clusters, creating a 3D network of D-1. The green disordered tetradecahedron represents the {Mn<sub>13</sub>} core. a) the packing arrangement viewed along *a*-axis, b) the packing arrangement viewed along *b*-axis, c) the packing arrangement viewed along *c*-axis. (Cu<sup>II</sup> blue, Mn<sup>III</sup> yellow, Mn<sup>II</sup> green, O red, C gray, hydrogen atoms omitted for clarity)

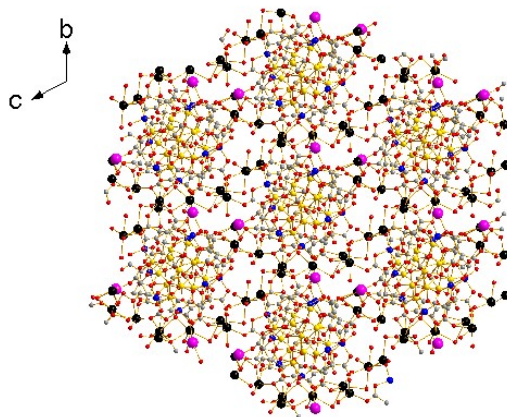

**Figure S3.** Ball-and-stick representation the 3D supramolecular assembly of D-1 viewed along  $a$ -axis. (Cu<sup>II</sup> blue, Mn<sup>III</sup> yellow, Mn<sup>II</sup> green, O red, C gray, Na black, K pink, hydrogen atoms omitted for clarity)

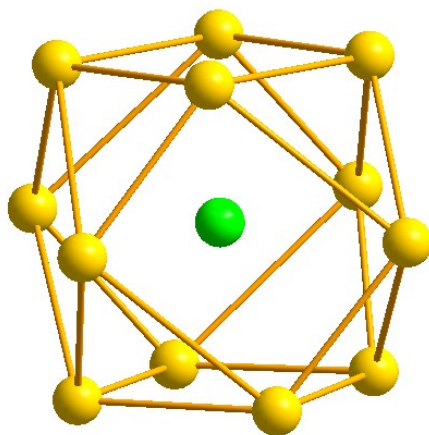

**Figure S4.** The  $\{Mn_{12}\}$  irregular tetradecahedron with a central MnII in D-1. (Mn<sup>III</sup> yellow, Mn<sup>II</sup> green)

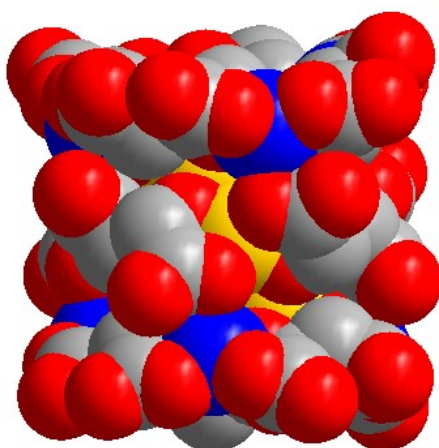

**Figure S5.** Space-filling representation of D-1. (Cu<sup>II</sup> blue, Mn<sup>III</sup> yellow, Mn<sup>II</sup> green, O red, C gray, hydrogen atoms omitted for clarity)

### Section 3: Supplementary Physical Characterization

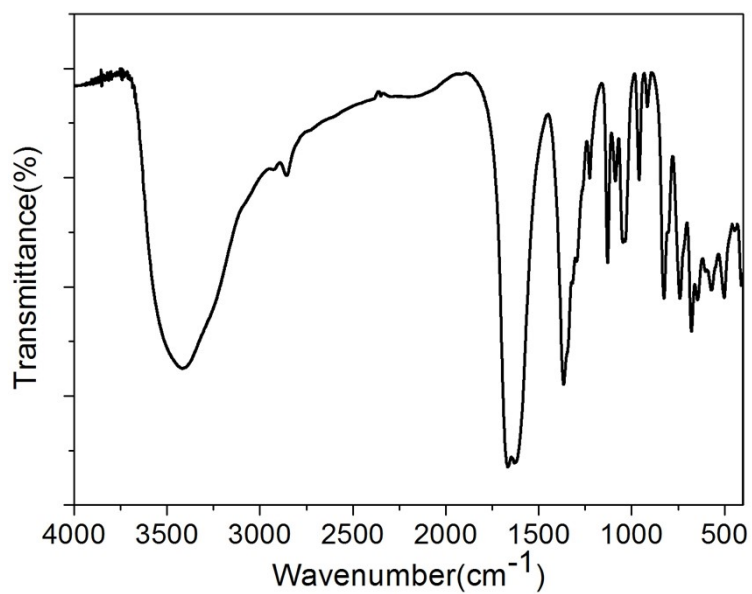

**Figure S6.** IR spectrum of L-1.

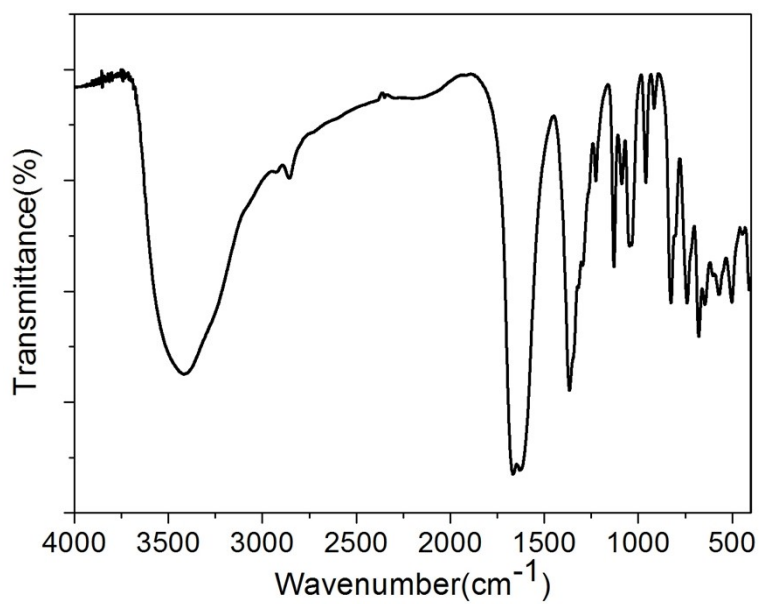

**Figure S7.** IR spectrum of D-1.



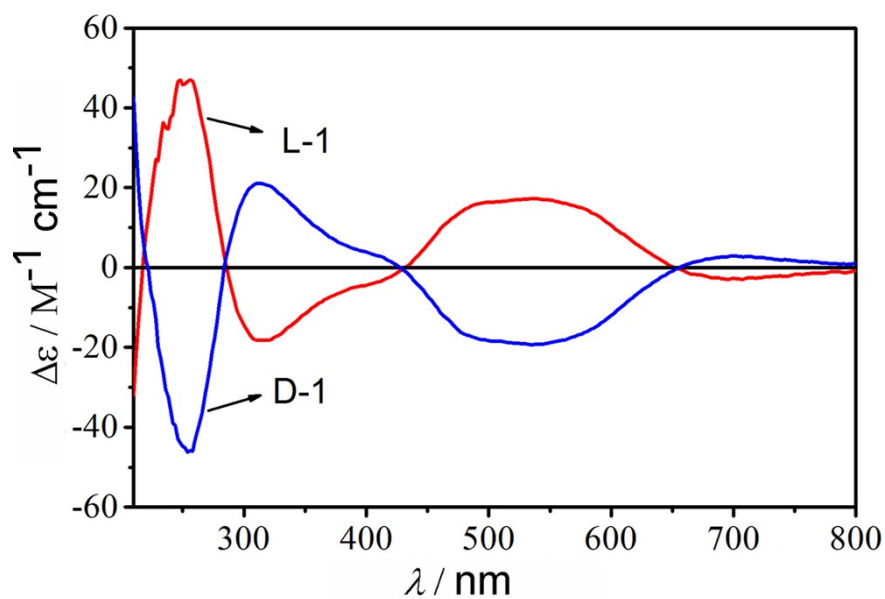

**Figure S8.** CD spectra of L-1 and D-1 in a 0.5 M NaOAc/HOAc buffer solution at pH 5.5.

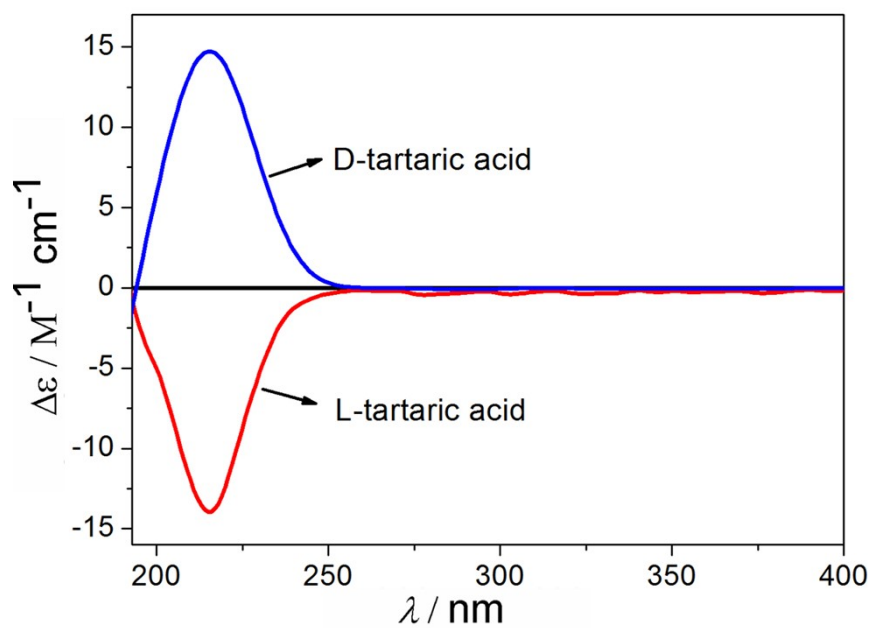

**Figure S9.** CD spectra of L-(+)- and of D-(-)-tartaric acid in water.

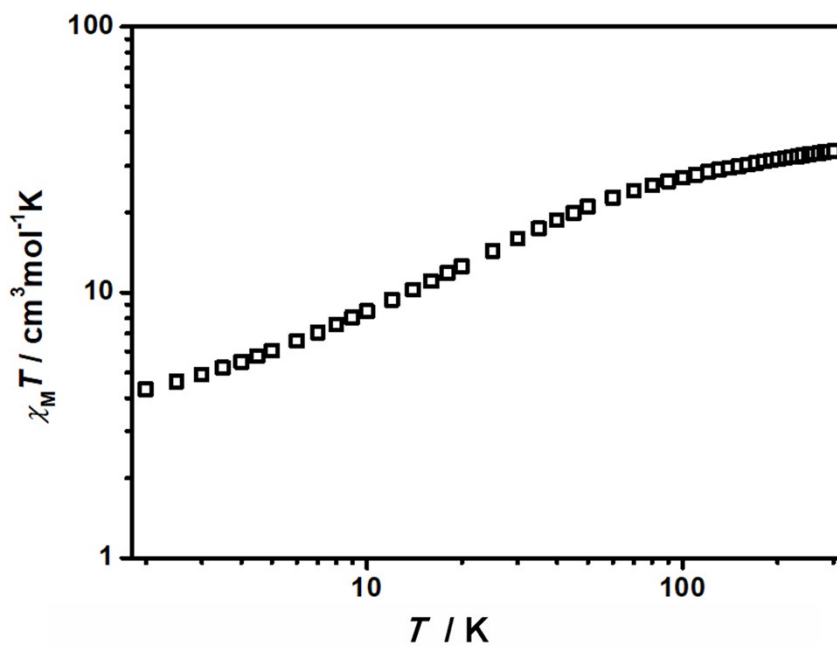

**Figure S10.** Variable temperature dc susceptibility data for D-1 in a field of 2000 Oe from 2 – 300 K in log scale.

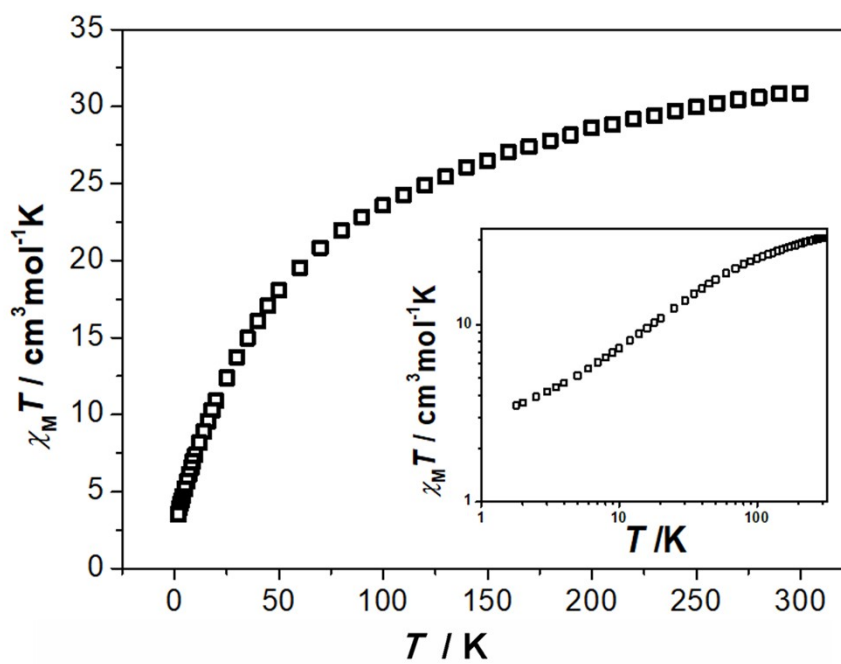

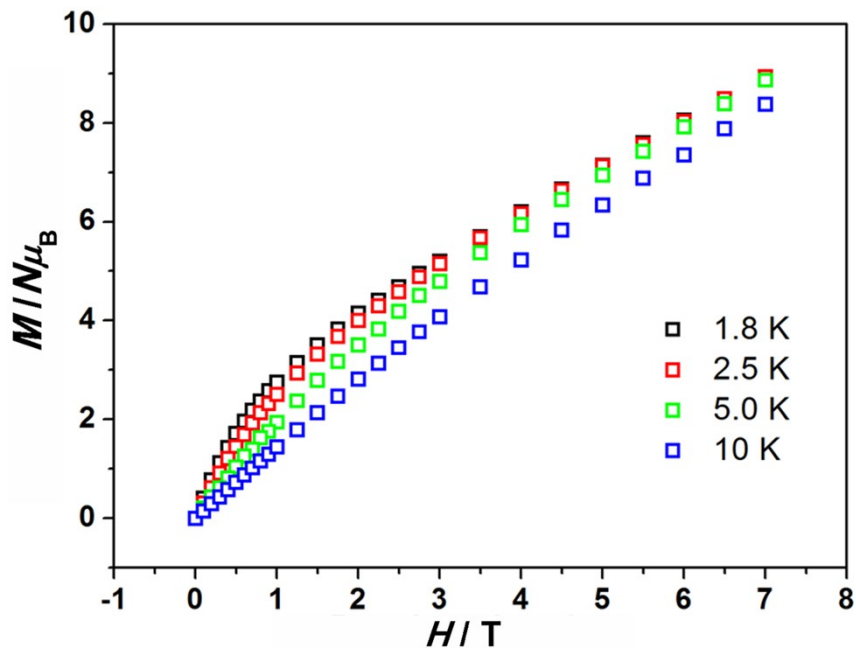

**Figure S11.** Variable temperature dc susceptibility data for L-1 in a field of 2000 Oe from 2 – 300 K (top). Magnetisation versus field plots at temperatures of 1.8, 2.5, 5.0 and 10 K for L-1 (bottom).

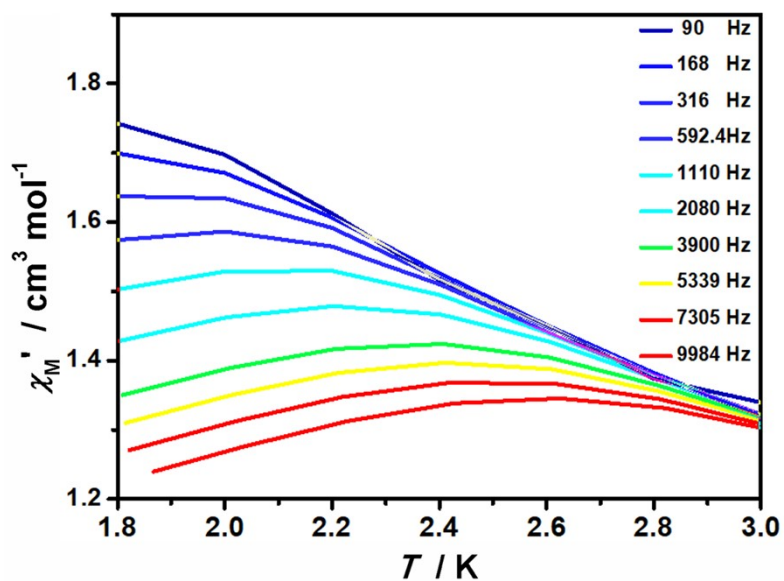

**Figure S12.** Temperature dependent in-phase susceptibility signals D-1 in a 0 Oe dc applied magnetic field, in the temperature range 1.8 – 3.0 K.

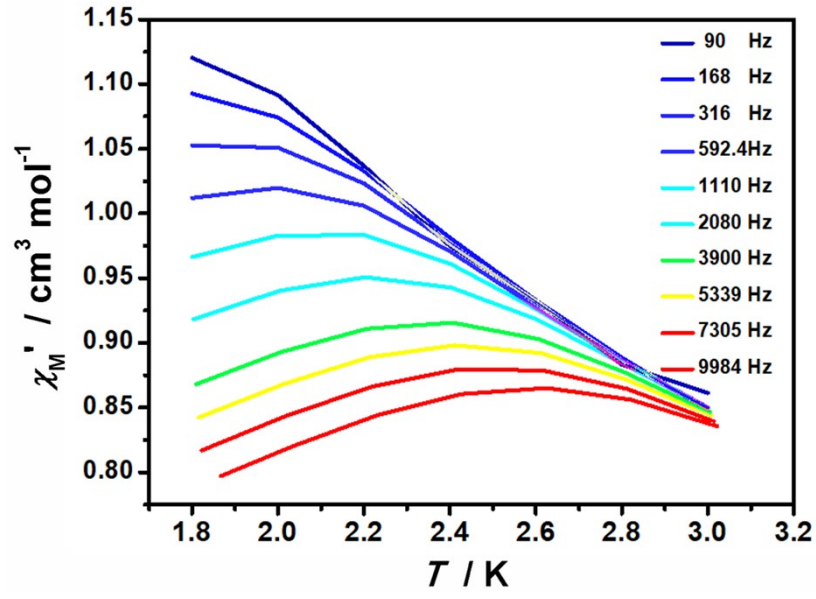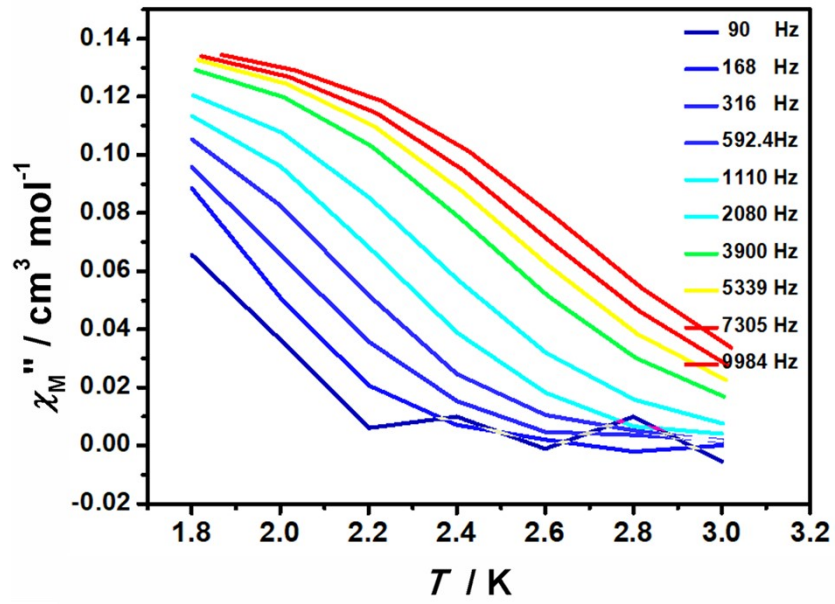

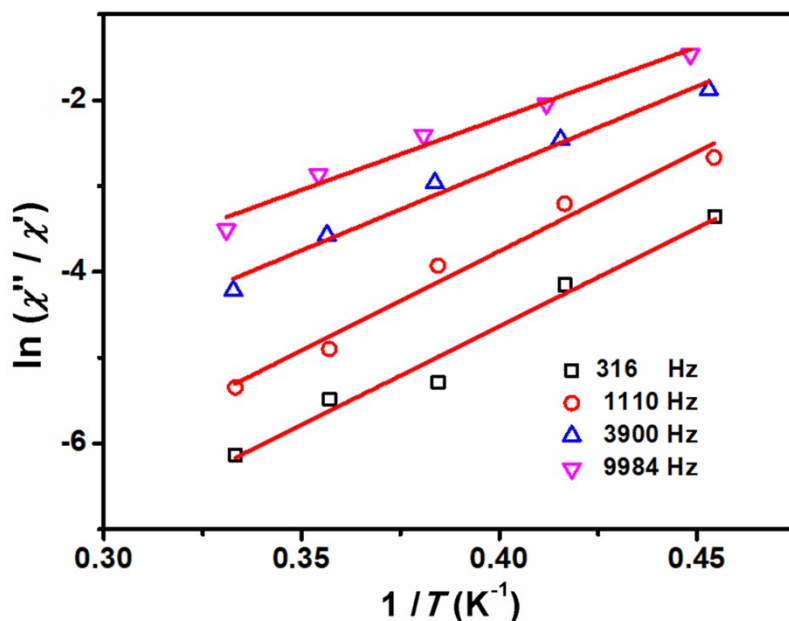

**Figure S13.** The temperature-dependence of in phase (top) and out-of-phase (middle) magnetization susceptibility of L-1 at different frequencies by SQUID VSM. The reversed energy barrier fitting plot with  $\ln(\chi'' / \chi') = \ln(\omega\tau_0) + U/k_B T$  (bottom). The energy barrier is ca.  $U = 19 (\pm 4)$  K and  $\tau_0 = 2.0 (\pm 0.3) \times 10^{-9}$  s.

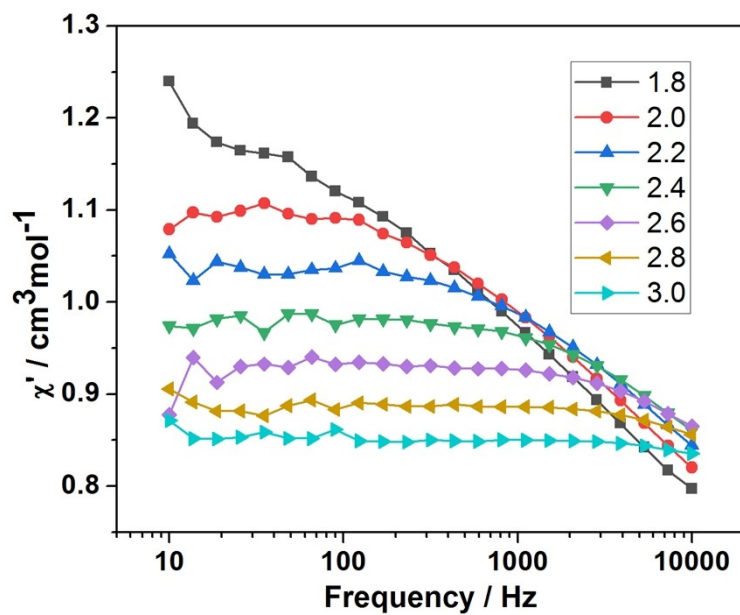

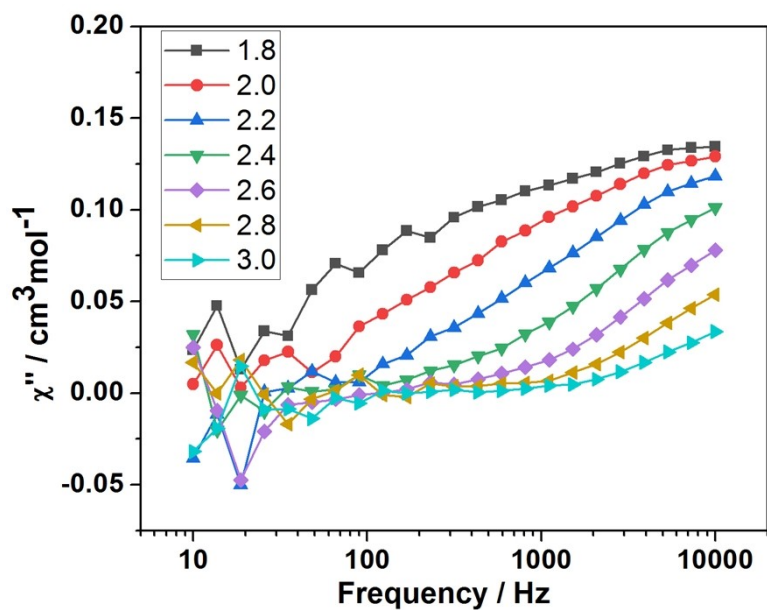

**Figure S14.** Frequency dependent in-phase (top) and out-of-phase (bottom) susceptibility signals for L-1 in a 0 Oe dc applied magnetic field, in the temperature range 1.8 – 3.0 K.

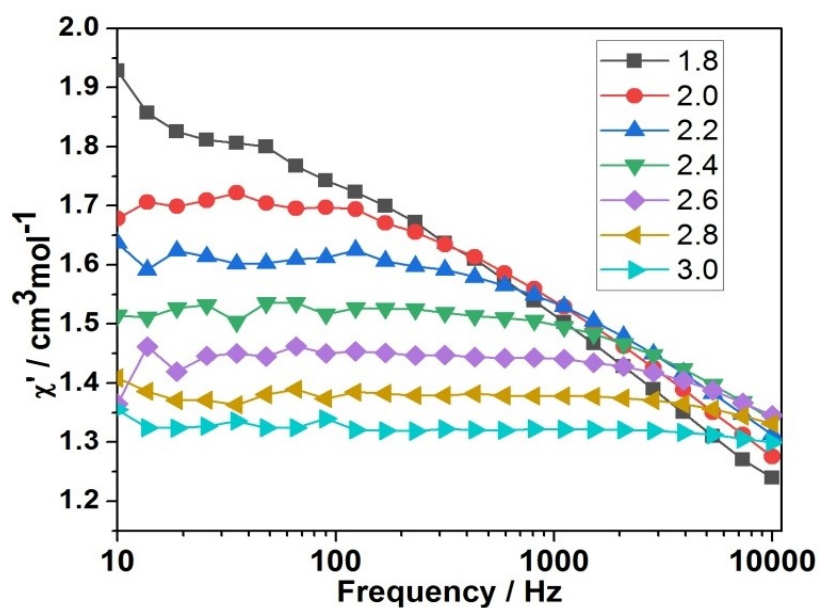

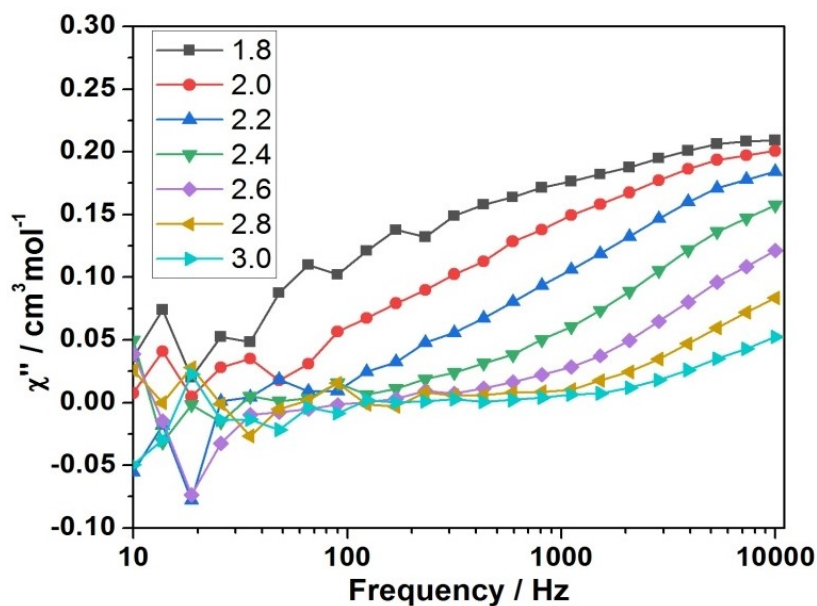

**Figure S15.** Frequency dependent in-phase (top) and out-of-phase (bottom) susceptibility signals for D-1 in a 0 Oe dc applied magnetic field, in the temperature range 1.8 – 3.0 K.

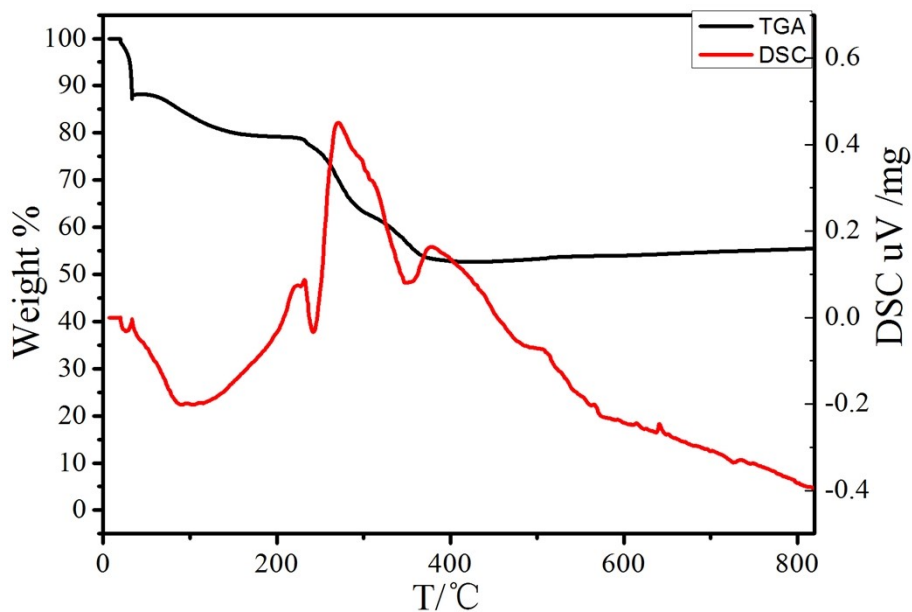

**Figure S16.** TGA of L-1.

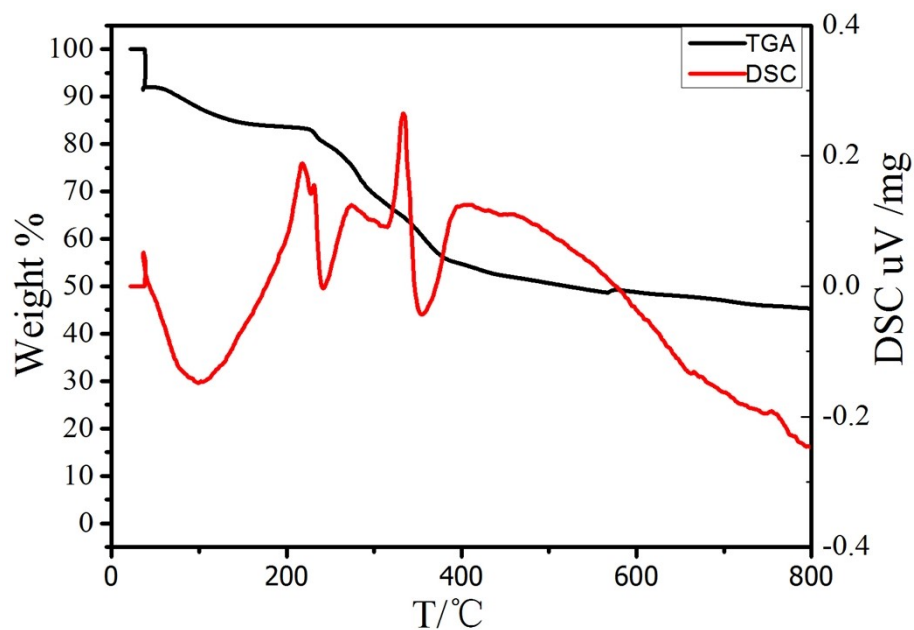

Figure S17. TGA of D-1.

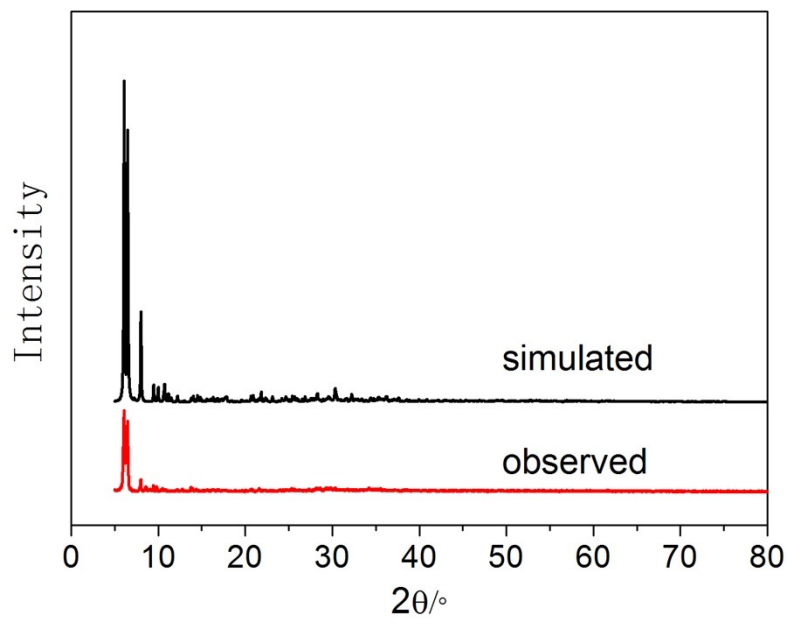

Figure S18. Simulated and observed powder X-ray diffraction (PXRD) of L-1.



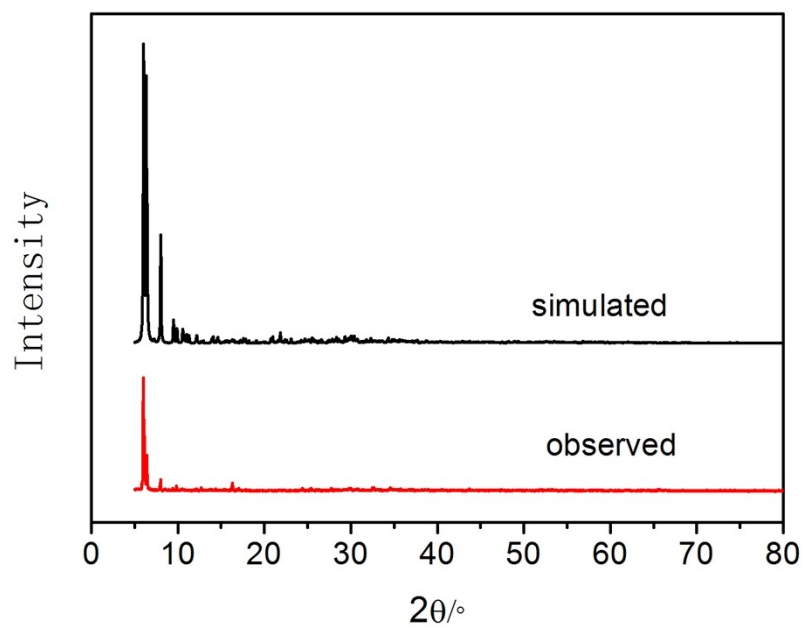

**Figure S19.** Simulated and observed powder X-ray diffraction (PXRD) of D-1.

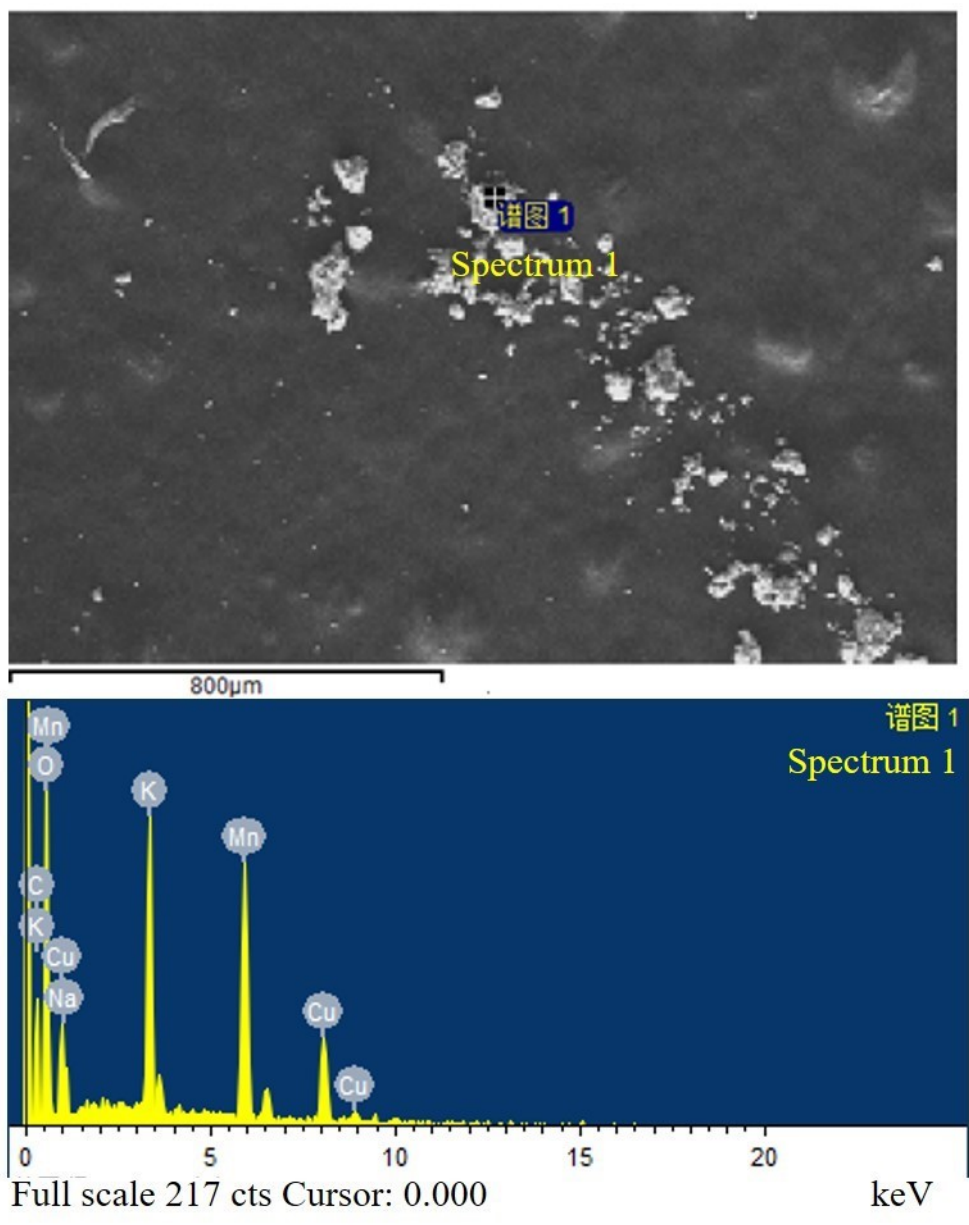

**Figure S20.** The EDS characterization for L-1.

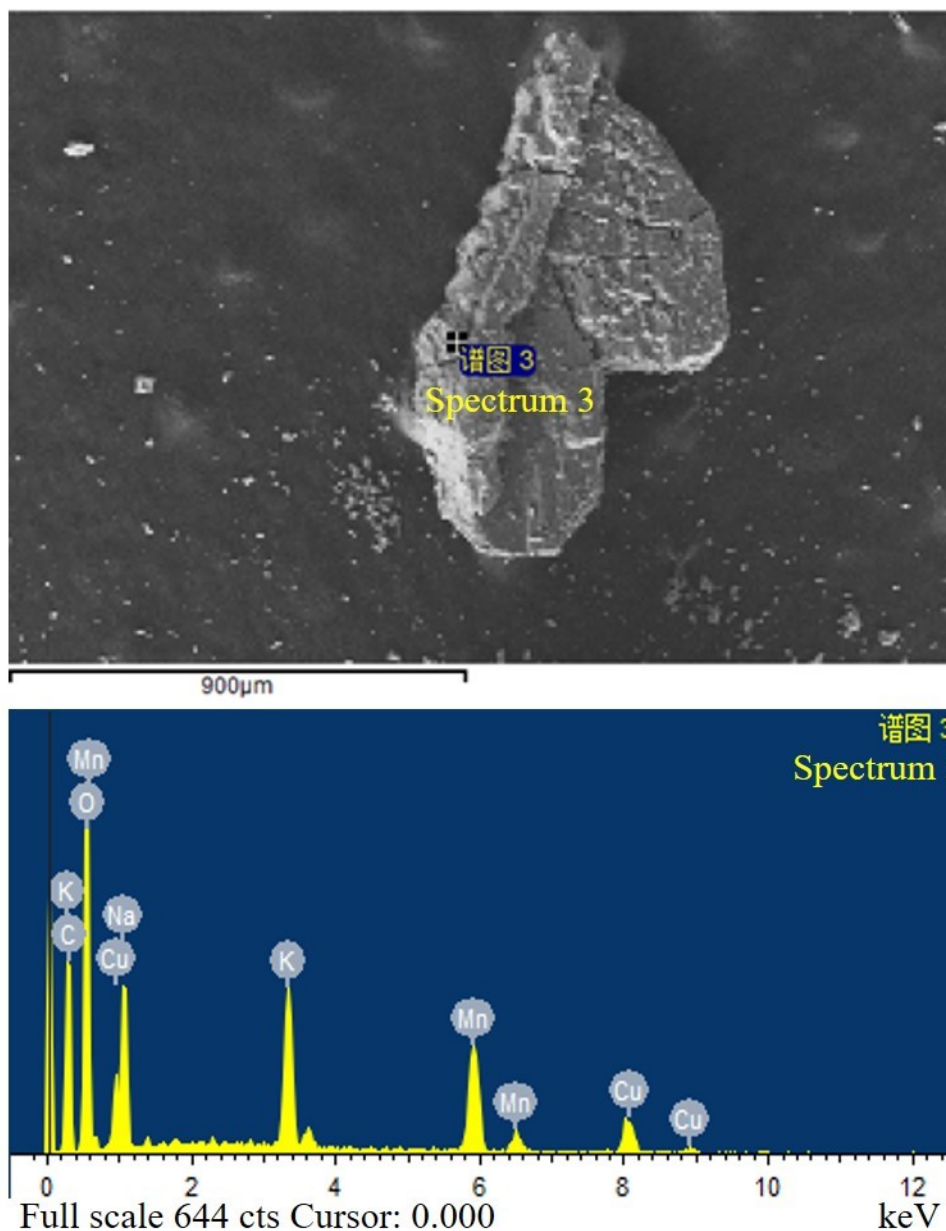

**Figure S21.** The EDS characterization for D-1.

**Table S3.** Selected bond distances (Å) and bond angles (°) in L-1

|         | Å      |          | Å      |          | Å      |           | Å      |              | °      |
|---------|--------|----------|--------|----------|--------|-----------|--------|--------------|--------|
| Mn1-075 | 2.325  | Mn4-019  | 1.8759 | Mn7-081  | 1.8690 | Mn10-019  | 1.9109 | 05-Mn1-039   | 76.222 |
| Mn1-019 | 2.3708 | Mn4-075  | 1.8851 | Mn7-086  | 1.8862 | Mn10-024  | 1.9510 | 019-Mn1-041  | 76.972 |
| Mn1-077 | 2.345  | Mn4-014  | 1.9120 | Mn7-084  | 1.9422 | Mn10-065  | 2.1305 | 033-Mn2-074  | 92.375 |
| Mn1-041 | 2.3364 | Mn4-012  | 1.9382 | Mn7-0122 | 2.1173 | Mn10-073  | 2.4737 | 072-Mn2-079  | 95.426 |
| Mn1-079 | 2.3597 | Mn4-0120 | 2.1621 | Mn7-037  | 2.6506 | Mn11-0122 | 1.8758 | 048-Mn6-050  | 81.740 |
| Mn1-039 | 2.3536 | Mn4-073  | 2.5122 | Mn8-039  | 1.8883 | Mn11-065  | 1.8921 | 073-Mn6-075  | 79.959 |
| Mn1-081 | 2.3591 | Mn5-0110 | 1.8786 | Mn8-038  | 1.8883 | Mn11-019  | 2.0383 | 041-Mn7-081  | 90.421 |
| Mn2-041 | 1.8826 | Mn5-0120 | 1.8935 | Mn8-077  | 1.8947 | Mn11-0123 | 2.0458 | 086-Mn7-0122 | 94.528 |

|         |         |          |         |          |         |           |         |               |          |
|---------|---------|----------|---------|----------|---------|-----------|---------|---------------|----------|
| Mn2-074 | 1. 8967 | Mn5-075  | 2. 0680 | Mn8-036  | 1. 9541 | Mn11-0116 | 2. 1042 | 038-Mn8-039   | 95. 195  |
| Mn2-079 | 1. 9074 | Mn5-0112 | 2. 0714 | Mn8-071  | 2. 1294 | Mn11-041  | 2. 1247 | 036-Mn8-077   | 97. 056  |
| Mn2-072 | 1. 9344 | Mn5-104  | 2. 0771 | Mn8-073  | 2. 5626 | Mn12-079  | 1. 8786 | 09-Mn9-039    | 97. 86   |
| Mn2-033 | 2. 1386 | Mn5-081  | 2. 1069 | Mn9-0108 | 1. 8910 | Mn12-05   | 1. 8873 | 09-Mn9-0100   | 101. 528 |
| Mn2-037 | 2. 5501 | Mn6-039  | 1. 8864 | Mn9-09   | 1. 8946 | Mn12-062  | 1. 9000 | 024-Mn10-065  | 98. 004  |
| Mn3-033 | 1. 8784 | Mn6-075  | 1. 9028 | Mn9-039  | 2. 0649 | Mn12-060  | 1. 9513 | 073-Mn10-077  | 80. 965  |
| Mn3-071 | 1. 8820 | Mn6-050  | 1. 9097 | Mn9-0100 | 2. 0838 | Mn12-09   | 2. 1416 | 069-Mn9-0100  | 96. 51   |
| Mn3-079 | 2. 0627 | Mn6-048  | 1. 9422 | Mn9-05   | 2. 0959 | Mn12-037  | 2. 4992 | 0100-Mn9-0108 | 80. 315  |
| Mn3-063 | 2. 0748 | Mn6-0108 | 2. 1436 | Mn9-069  | 2. 1202 | Mn13-05   | 1. 8724 | 05-Mn13-037   | 77. 846  |
| Mn3-077 | 2. 0861 | Mn6-073  | 2. 4646 | Mn10-077 | 1. 8859 | Mn13-098  | 1. 9064 | 096-Mn13-098  | 80. 898  |
| Mn3-067 | 2. 1264 | Mn7-041  | 1. 8616 | Mn10-026 | 1. 9075 | Mn13-096  | 1. 9304 | 096-Mn13-037  | 92. 641  |
